# Supplementary material for: Comparison of cryptobenthic reef fish communities among microhabitats in the Red Sea
Source: PeerJ. 2018 Jun 18;6:e5014. doi: 10.7717/peerj.5014 (PMC6011822; doi:10.7717/peerj.5014)
Supplement: Supplemental Information 5 — Raw data for all fish and goby communities. Tables show abundance, richness, and diversity, as well as rugosity and percent cover of habitat. [file peerj-06-5014-s005.xlsx]

## Sheet: Sheet1
All Fish	Microhabitat	Abundance	Richness	Diversity	Rugosity	Percent Cover
	Coral
	1	19	12	2.36	---	87.5
	2	17	8	1.89	1.19	90.2
	3	28	15	2.29	---	78.4
	4	2	2	0.69	1.23	75
	5	17	8	1.89	1.42	95.2
	Average	16.6	9	1.82	1.28	85.26
	Standard error	4.17852	2.19089	0.299927	0.0549545	4.83522
	Rubble
	1	39	19	2.69	1.07	62.5
	2	21	8	1.6	1.11	62.6
	3	65	23	2.59	1.07	53.1
	4	31	14	2.49	1.1	70.3
	5	52	23	2.76	1.12	79.6
	Average	41.6	17.4	2.43	1.094	65.62
	Standard error	7.74338	2.87402	0.211485	0.0102956	4.43254
	Sand
	1	7	6	1.75	1.02	95.1
	2	5	5	1.61	1.04	99
	3	15	12	2.4	1.01	98.2
	4	1	1	0	1	98
	5	7	4	1.15	1.01	98
	Average	7	5.6	1.38	1.016	97.66
	Standard error	2.28035	1.80555	0.399217	0.00678233	0.666033
Gobies	Microhabitat	Abundance	Richness	Diversity	Rugosity	Percent Cover
	Coral
	1	10	6	1.75	---	87.5
	2	11	6	1.67	1.19	90.2
	3	15	5	1.08	---	78.4
	4	2	2	0.69	1.23	75
	5	10	5	1.5	1.42	95.2
	Average	9.6	4.8	1.34	1.28	85.26
	Standard error	2.11187	0.734847	0.199083	0.070946	4.83522
	Rubble
	1	30	12	2.25	1.07	62.5
	2	20	7	1.48	1.11	62.6
	3	46	12	1.87	1.07	53.1
	4	29	12	2.36	1.1	70.3
	5	36	15	2.27	1.12	79.6
	Average	32.2	11.6	2.04	1.094	65.62
	Standard error	4.29418	1.28841	0.164578	0.0102956	4.43254
	Sand
	1	3	3	1.1	1.02	95.1
	2	3	3	1.1	1.04	99
	3	11	8	1.97	1.01	98.2
	4	0	0	0	1	98
	5	6	3	0.87	1.01	98
	Average	4.6	3.4	1	1.016	97.66
	Standard error	1.86011	1.28841	0.314442	0.00678233	0.666033
