# Supplementary material for: Comparison of cryptobenthic reef fish communities among microhabitats in the Red Sea
Source: PeerJ. 2018 Jun 18;6:e5014. doi: 10.7717/peerj.5014 (PMC6011822; doi:10.7717/peerj.5014)
Supplement: Supplemental Information 9 — Used to calculate ANOVAs for all fish and all goby abundance, richness, and diversity, as well as rugosity in R. [file peerj-06-5014-s009.xls]

## Sheet: Goby communities for ANOVA.csv
Rugosity	Diversity	Richness	Abundance	Habitat	Quadrat
	1.75	6	10	Coral	1
1.19	1.67	6	11	Coral	2
	1.08	5	15	Coral	3
1.23	0.69	2	2	Coral	4
1.42	1.5	5	10	Coral	5
1.07	2.25	12	30	Rubble	1
1.11	1.48	7	20	Rubble	2
1.07	1.87	12	46	Rubble	3
1.1	2.36	12	29	Rubble	4
1.12	2.27	15	36	Rubble	5
1.02	1.1	3	3	Sand	1
1.04	1.1	3	3	Sand	2
1.01	1.97	8	11	Sand	3
1	0	0	0	Sand	4
1.01	0.87	3	6	Sand	5

## Sheet: All fish communities for ANOVA.
Rugosity	Diversity	Richness	Abundance	Habitat	Quadrat
	2.36	12	19	Coral	1
1.19	1.89	8	17	Coral	2
	2.29	15	28	Coral	3
1.23	0.69	2	2	Coral	4
1.42	1.89	8	17	Coral	5
1.07	2.69	19	39	Rubble	1
1.11	1.6	8	21	Rubble	2
1.07	2.59	23	65	Rubble	3
1.1	2.49	14	31	Rubble	4
1.12	2.76	23	52	Rubble	5
1.02	1.75	6	7	Sand	1
1.04	1.61	5	5	Sand	2
1.01	2.4	12	15	Sand	3
1	0	1	1	Sand	4
1.01	1.15	4	7	Sand	5
